# Supplementary material
Source: MDPI journal article supplement (https://www.mdpi.com/2313-0105/4/4/55)
Supplement: s1 [file s1]

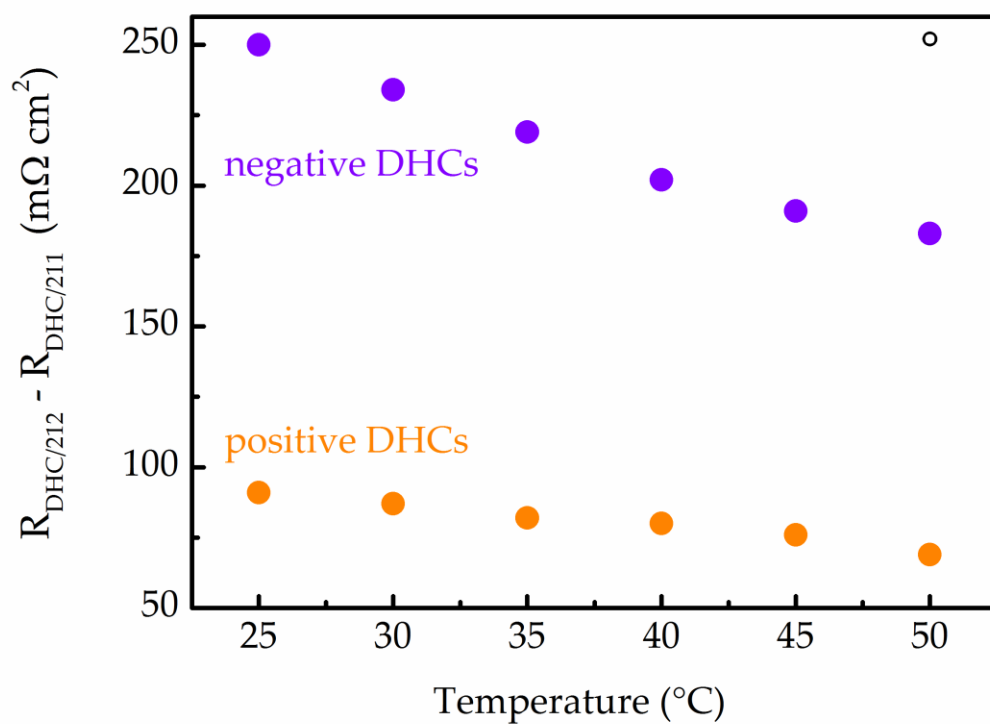

**Figure S1.** Difference in resistance of positive and negative DHCs using NR-211 and NR-212 membranes at different temperatures.
